# Supplementary material for: Salicylic Acid Protects Sweet Potato Seedlings from Drought Stress by Mediating Abscisic Acid-Related Gene Expression and Enhancing the Antioxidant Defense System
Source: MDPI journal article supplement (doi:10.3390/ijms232314819), 2022-11-26
Supplement: s1 [file s1]

## Supplemental Tables

**Table S1.** Effects of drought stress on growth traits of sweet potato

| Vine length(cm) |            |            | Dry matter weight(g) |            | Leaf area(cm <sup>2</sup> ) |            |
|-----------------|------------|------------|----------------------|------------|-----------------------------|------------|
|                 | ZS77       | ZS13       | ZS77                 | ZS13       | ZS77                        | ZS13       |
| CK              | 25.69±2.18 | 27.42±2.21 | 27.74±3.36           | 29.67±3.28 | 33.95±4.10                  | 36.73±4.28 |
| C0              | 14.81±1.67 | 15.46±1.42 | 15.35±1.78           | 16.43±1.03 | 19.58±1.35                  | 20.71±1.22 |

The dry matter weight and leaf area were given for per plant.

**Table S2.** The primers used for real-time RT-PCR.

|                   |                      |
|-------------------|----------------------|
| <i>NCED3-like</i> |                      |
| Forward primer    | ATCTGCGCTTCACACTCCTC |
| Reverse primer    | ACTTTCGGGTGGGCAATCAT |
| <i>β-actin</i>    |                      |
| Forward primer    | ACTCAGTGGCGGGACTAC   |
| Reverse primer    | CTGTGAACAATTGACGGACC |
